# Supplementary material
Source: PubMed Central journal article supplement (PMC4704457)
Supplement: NIHMS745427-supplement-Supplementary_Data.pdf [file NIHMS745427-supplement-Supplementary_Data.pdf]

Identification

Screening

Eligibility

Included

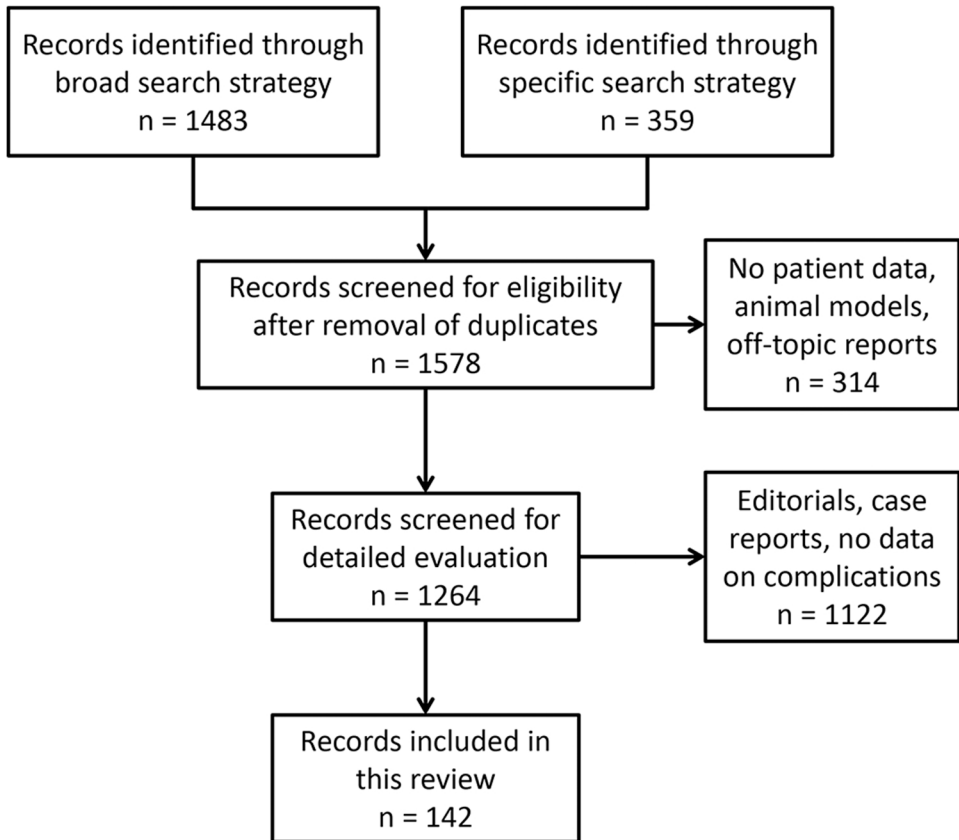

**TABLE S1: Complications of Decompressive Craniectomy<sup>a</sup>**

| Authors and Year                                                                                                                                                                                                                                                                                                                          | Complication <sup>b</sup>              | Indication for DC <sup>b</sup> | Reported Frequency <sup>c</sup> | Overall Frequency <sup>c</sup> |
|-------------------------------------------------------------------------------------------------------------------------------------------------------------------------------------------------------------------------------------------------------------------------------------------------------------------------------------------|----------------------------------------|--------------------------------|---------------------------------|--------------------------------|
| <b>Hemorrhagic Complications</b>                                                                                                                                                                                                                                                                                                          |                                        |                                |                                 |                                |
| Gouello et al. 2014 [18]<br>Honeybul et al., 2014 [20]<br>Wang et al., 2014 [23]<br>Huang et al., 2013 [22]<br>Al-Jishi et al., 2011 [36]<br>Cooper et al., 2011 [14]<br>Guresir et al., 2011 [19]<br>Honeybul et al., 2011 [38]<br>Huang et al., 2011 [21]<br>Akyuz et al., 2010 [39]<br>Qiu et al., 2009 [15]<br>Flint et al. 2008 [17] | New Ipsilateral Hematoma               | TBI                            | 12.9% (188/1455)                | 10.2% (236/2297)               |
| Fischer et al., 2011 [40]<br>Guresir et al., 2011 [19]                                                                                                                                                                                                                                                                                    |                                        | Stroke                         | 6.5% (7/108)                    |                                |
| Zhang et al., 2013 [34]<br>Fung et al., 2012 [16]<br>Guresir et al., 2011 [19]                                                                                                                                                                                                                                                            |                                        | ICH                            | 6.3% (5/80)                     |                                |
| Guresir et al., 2011 [19]                                                                                                                                                                                                                                                                                                                 |                                        | SAH                            | 2.5% (2/79)                     |                                |
| Woertgen et al., 2006 [41]                                                                                                                                                                                                                                                                                                                |                                        | SDH                            | 1.1% (2/180)                    |                                |
| Oladunjoye et al., 2013 [13]<br>Missori et al., 2013 [33]<br>Im et al., 2012 [35]<br>Guresir et al., 2011 [19]<br>Kumar et al., 2011 [37]<br>Hitchings et al., 2010 [43]                                                                                                                                                                  |                                        | Numerous                       | 8.1% (32/395)                   |                                |
| Huang et al., 2013 [22]<br>Huang et al., 2011 [21]<br>Wen et al., 2011 [24]<br>Ban et al., 2010 [27]<br>Stephens et al., 2010 [66]<br>Yang et al., 2008 [25]<br>Flint et al. 2008 [17]<br>Matsuno et al., 2003 [26]                                                                                                                       | New Contralateral/Remote Hematoma      | TBI                            | 8.6% (63/732)                   | 8.6% (63/732)                  |
| Huang et al., 2013 [22]<br>Chen et al., 2012 [54]<br>Qiu et al., 2012 [50]<br>Sturiale et al., 2012 [49]<br>Ban et al., 2010 [27]<br>Aarabi et al., 2009 [51]<br>Qiu et al., 2009 [15]<br>Williams et al., 2009 [28]<br>Flint et al. 2008 [17]                                                                                            | Hemorrhagic Progression of a Contusion | TBI                            | 12.6% (163/1256)                | 12.6% (164/1300)               |

|                                                                                                                                                                                                                                 |                            |                    |                 |                         |
|---------------------------------------------------------------------------------------------------------------------------------------------------------------------------------------------------------------------------------|----------------------------|--------------------|-----------------|-------------------------|
| Huang et al., 2008 [52]<br>Li et al., 2008 [55]<br>Chibbaro et al., 2007 [53]<br>Aarabi et al., 2006 [29]                                                                                                                       |                            |                    |                 |                         |
| Aaron et al., 2013 [3]                                                                                                                                                                                                          |                            | Other              | 2.7% (1/44)     |                         |
| Creutzfeld et al., 2014 [60]<br>Raffiq et al., 2014 [58]<br>Schuss et al., 2013 [61]<br>Shao et al., 2013 [59]<br>Kenning et al., 2012 [30]<br>Lee et al., 2012 [31]<br>Takeuchi et al., 2012 [56]<br>Wirtz et al., 1997 [57]   | Hemorrhagic Transformation | Stroke             | 23.7% (123/519) | 23.7% (123/519)         |
| Infectious, Inflammatory and Wound Healing Complications                                                                                                                                                                        |                            |                    |                 |                         |
| Gouello et al. 2014 [18]<br>Mezue et al., 2013 [63]<br>Cooper et al., 2011 [14]<br>De Bonis et al., 2011 [65]<br>Huang et al., 2011 [21]<br>Huang et al., 2008 [52]<br>Stephens et al., 2010 [66]<br>Chibbaro et al., 2007 [53] | Superficial Complications  | TBI                | 6.9% (45/649)   | 8.1% (81/1003)<br>Adult |
| Madhugiri et al., 2011 [72]<br>Kan et al., 2006 [71]                                                                                                                                                                            |                            | Pediatrics         | 6.5% (4/62)     |                         |
| Adamo et al., 2009 [73]                                                                                                                                                                                                         |                            | Neonatal TBI       | 42.8% (3/7)     |                         |
| Cho et al., 2003 [69]<br>Koh et al., 2000 [70]                                                                                                                                                                                  |                            | Stroke             | 3.8% (2/52)     |                         |
| Sughrue et al., 2011 [62]                                                                                                                                                                                                       |                            | Trauma, ICH        | 22.8% (29/127)  |                         |
| Godil et al., 2011 [64]                                                                                                                                                                                                         |                            | Numerous           | 3.4% (3/89)     |                         |
| Aaron et al., 2013 [3]<br>Malmivaara et al., 2011 [12]                                                                                                                                                                          |                            | Other              | 2.3% (2/86)     |                         |
| Qiu et al., 2012 [50]<br>Cooper et al., 2011 [14]<br>Bao et al., 2010 [74]<br>Qiu et al., 2009 [15]<br>Howard et al., 2008 [75]<br>Yang et al., 2008 [25]<br>Jiang et al., 2005 [76]                                            |                            | Deep Complications | TBI             |                         |
| Perez et al., 2011 [77]<br>Kan et al., 2006 [71]                                                                                                                                                                                | Peds TBI                   |                    | 4.1% (2/49)     |                         |
| Adamo et al., 2009 [73]                                                                                                                                                                                                         | Neonatal TBI               |                    | 42.9% (3/7)     |                         |
| Vahedi et al., 2007 [79]<br>Mori et al., 2004 [78]                                                                                                                                                                              | Stroke                     |                    | 5.9% (7/119)    |                         |
| Hitchings et al. 2010 [43]                                                                                                                                                                                                      | Numerous                   |                    | 5.6% (3/54)     |                         |
| Aaron et al., 2013 [3]                                                                                                                                                                                                          | Other                      |                    | 2.3% (1/44)     |                         |

|                                                                                                                                                                                                                                    |                               |                                                                     |                  |                              |
|------------------------------------------------------------------------------------------------------------------------------------------------------------------------------------------------------------------------------------|-------------------------------|---------------------------------------------------------------------|------------------|------------------------------|
| Cooper et al., 2011 [14]<br>Huang et al., 2011 [21]<br>Malmivaara et al., 2011 [11]<br>Akyuz et al., 2010 [39]<br>De Bonis et al., 2010 [83]<br>Paci et al., 2009 [84]<br>Morgalla et al., 2008 [85]<br>Albanese et al., 2003 [86] | Meningitis/Ventri-<br>culitis | TBI                                                                 | 4.0% (25/628)    | 6.1%<br>(63/1035)<br>Adult   |
| Perez et al., 2011 [77]<br>Jagannathan et al., 2007 [82]                                                                                                                                                                           |                               | Peds TBI                                                            | 8.1% (3/37)      |                              |
| Takeuchi et al., 2013 [87]<br>Takeuchi et al., 2012 [56]<br>Pfefferkorn et al., 2009 [89]<br>Fandino et al., 2004 [80]<br>Koh et al., 2000 [70]                                                                                    |                               | Stroke                                                              | 8.1% (14/173)    |                              |
| Takeuchi et al., 2013 [81]<br>Takeuchi et al., 2013 [88]<br>Sughrue et al., 2011 [62]                                                                                                                                              |                               | Trauma, ICH                                                         | 12.8% (19/148)   |                              |
| Malmivaara et al., 2011 [12]                                                                                                                                                                                                       |                               | Numerous                                                            | 9.5% (4/42)      |                              |
| Aaron et al., 2013 [3]                                                                                                                                                                                                             |                               | Other                                                               | 2.3% (1/44)      |                              |
| Kung et al., 2012 [92]<br>Chun et al., 2011 [93]<br>Guresir et al., 2011 [19]<br>Huang et al., 2011 [21]<br>Ban et al., 2010 [27]<br>Qiu et al., 2009 [15]<br>Albanese et al., 2003 [86]                                           |                               | Wound Healing<br>Disturbance/Absc<br>ess not Otherwise<br>Specified | TBI              |                              |
| Schuss et al., 2013 [61]<br>Kenning et al., 2012 [30]<br>Guresir et al., 2011 [19]                                                                                                                                                 | Stroke                        |                                                                     | 13.7% (29/212)   |                              |
| Guresir et al., 2011 [19]                                                                                                                                                                                                          | SAH                           |                                                                     | 3.8% (3/79)      |                              |
| Hayes et al., 2013 [91]<br>Guresir et al., 2011 [19]                                                                                                                                                                               | ICH                           |                                                                     | 4.3% (3/41)      |                              |
| Sughrue et al., 2011 [62]                                                                                                                                                                                                          | Trauma, ICH                   |                                                                     | 9.4% (12/127)    |                              |
| Oladunjoye et al., 2013 [13]<br>Guresir et al., 2011 [19]<br>Kumar et al., 2011 [37]                                                                                                                                               | Numerous                      |                                                                     | 8.1% (12/185)    |                              |
| Raza et al., 2014 [90]                                                                                                                                                                                                             | Other                         |                                                                     | 85.7% (6/7)      |                              |
| CSF Disturbances                                                                                                                                                                                                                   |                               |                                                                     |                  |                              |
| Hartings et al., 2014 [94]<br>De Bonis et al., 2013 [95]<br>Honeybul et al., 2012 [96]<br>Qiu et al., 2012 [50]<br>Cooper et al., 2011 [14]<br>Ho et al., 2011 [10]<br>Honeybul et al., 2011 [38]                                  | Hydrocephalus                 | TBI                                                                 | 14.8% (290/1966) | 16.4%<br>(470/2868)<br>Adult |

|                                                                                                                                                                                                                                                                                                                                                                                                                                                                                                                                                                                                  |  |          |                |  |
|--------------------------------------------------------------------------------------------------------------------------------------------------------------------------------------------------------------------------------------------------------------------------------------------------------------------------------------------------------------------------------------------------------------------------------------------------------------------------------------------------------------------------------------------------------------------------------------------------|--|----------|----------------|--|
| <p>Malmivaara et al., 2011 [11]<br/> Su et al., 2011 [97]<br/> Wen et al., 2011 [24]<br/> Akyuz et al., 2010 [39]<br/> Ban et al., 2010 [27]<br/> Cavusoglu et al., 2010 [98]<br/> De Bonis et al., 2010 [83]<br/> Kaen et al., 2010 [99]<br/> Honeybul et al., 2010 [100, 101]<br/> Aarabi et al., 2009 [51]<br/> Adamo et al., 2009 [73]<br/> Huang et al., 2008 [52]<br/> Morgalla et al., 2008 [85]<br/> Stiver et al., 2008 [102]<br/> Yang et al., 2008 [25]<br/> Chibbaro et al., 2007 [53]<br/> Liang et al., 2007 [103]<br/> Guerra et al., 1999 [104]<br/> Polin et al., 1997 [42]</p> |  |          |                |  |
| <p>Raffiq et al., 2014 [58]<br/> Shao et al., 2013 [59]<br/> Takeuchi et al., 2013 [87]<br/> Kenning et al., 2012 [30]<br/> Lee et al., 2012 [31]<br/> Ropper et al., 2012 [105]<br/> Takeuchi et al., 2012 [56]<br/> Fandino et al., 2004 [80]</p>                                                                                                                                                                                                                                                                                                                                              |  | Stroke   | 25.5% (93/364) |  |
| <p>Heuts et al., 2013 [106]<br/> Takeuchi et al., 2013 [88]<br/> Ho et al., 2011 [10]<br/> Yanaka et al., 2000 [107]</p>                                                                                                                                                                                                                                                                                                                                                                                                                                                                         |  | ICH/SDH  | 21.1% (46/218) |  |
| <p>Godil et al., 2011 [64]<br/> Malmivaara et al., 2011 [12]<br/> Kim et al., 2009 [108]<br/> Shoakazemi et al., 2009 [109]<br/> Yoo et al., 1999 [110]</p>                                                                                                                                                                                                                                                                                                                                                                                                                                      |  | Numerous | 12.7% (40/315) |  |

|                                                                                                                                                                                                                                                                                                                                                                                                                                                                                                                                                                                                                                                                                                                                                                                                                                   |                           |          |                  |                           |
|-----------------------------------------------------------------------------------------------------------------------------------------------------------------------------------------------------------------------------------------------------------------------------------------------------------------------------------------------------------------------------------------------------------------------------------------------------------------------------------------------------------------------------------------------------------------------------------------------------------------------------------------------------------------------------------------------------------------------------------------------------------------------------------------------------------------------------------|---------------------------|----------|------------------|---------------------------|
| <p>Honeybul et al., 2014 [20]<br/> Honeybul et al., 2012 [96]<br/> De Bonis et al., 2013 [95]<br/> Wang et al., 2012 [111]<br/> De Bonis et al., 2011 [65]<br/> Guresir et al., 2011 [19]<br/> Honeybul et al., 2011 [38]<br/> Huang et al., 2011 [21]<br/> Perez et al., 2011 [77]<br/> Su et al., 2011 [97]<br/> Wen et al., 2011 [24]<br/> Akyuz et al., 2010 [39]<br/> Ban et al., 2010 [27]<br/> Honeybul et al., 2010 [100]<br/> Honeybul et al., 2010 [101]<br/> Kaen et al., 2010 [99]<br/> Aarabi et al., 2009 [51]<br/> Qiu et al., 2009 [15]<br/> Yang et al., 2009 [112]<br/> Huang et al., 2008 [52]<br/> Li et al., 2008 [55]<br/> Stiver et al., 2008 [102]<br/> Yang et al., 2008 [25]<br/> Liang et al., 2007 [103]<br/> Aarabi et al., 2006 [29]<br/> Ucar et al., 2005 [68]<br/> Guerra et al., 1999 [104]</p> | Subdural Effusion/Hygroma | TBI      | 27.4% (723/2643) | 25.7% (807/3140)<br>Adult |
| Hejazi et al., 2002 [115]                                                                                                                                                                                                                                                                                                                                                                                                                                                                                                                                                                                                                                                                                                                                                                                                         |                           | Peds TBI | 57.1% (4/7)      |                           |
| <p>Shao et al., 2013 [59]<br/> Kenning et al., 2012 [30]<br/> Ropper et al., 2012 [105]<br/> Mandon et al., 2010 [113]<br/> Mori et al., 2004 [78]<br/> Yoo et al., 1999 [110]<br/> Schwab et al., 1998 [114]</p>                                                                                                                                                                                                                                                                                                                                                                                                                                                                                                                                                                                                                 |                           | Stroke   | 12.5% (42/336)   |                           |
| Woertgen et al., 2006 [41]                                                                                                                                                                                                                                                                                                                                                                                                                                                                                                                                                                                                                                                                                                                                                                                                        |                           | SDH      | 5.8% (4/69)      |                           |
| <p>Nalbach et al., 2012 [116]<br/> Malmivaara et al., 2011 [12]<br/> Ko et al., 2007 [160]</p>                                                                                                                                                                                                                                                                                                                                                                                                                                                                                                                                                                                                                                                                                                                                    |                           | Numerous | 41.3% (38/92)    |                           |
| <p>Qiu et al., 2012 [50]<br/> Al-Jishi et al., 2011 [36]<br/> Cooper et al., 2011 [14]<br/> Sughrue et al., 2011 [62]<br/> Ban et al., 2010 [27]<br/> Li et al., 2008 [55]<br/> Yang et al., 2008 [25]<br/> Polin et al., 1997 [42]</p>                                                                                                                                                                                                                                                                                                                                                                                                                                                                                                                                                                                           |                           | CSF Leak | TBI              |                           |

|                                                         |             |              |               |               |
|---------------------------------------------------------|-------------|--------------|---------------|---------------|
| Pfefferkorn et al., 2009 [89]<br>Mori et al., 2004 [78] |             | Stroke       | 8.8% (7/128)  |               |
| Godil et al., 2011 [64]                                 |             | Numerous     | 4.5% (4/89)   |               |
| Aaron et al., 2013 [3]                                  |             | Other        | 4.5% (2/44)   |               |
| Bao et al., 2010 [74]<br>Jiang et al., 2005 [76]        | CSF Fistula | TBI          | 5.2% (27/523) | 5.2% (27/523) |
| Adamo et al., 2009 [73]                                 |             | Neonatal TBI | 43% (3/7)     |               |

<sup>a</sup> TBI = traumatic brain injury; Stroke = ischemic stroke; ICH = intracerebral hemorrhage; SAH = subarachnoid hemorrhage. All data reported in this table refers to adult injury, except where specifically noted.

<sup>b</sup> Complications and indications for DC were categorized according to authors' descriptions.

<sup>c</sup> Frequencies were first calculated for individual reports and then averaged across all reports for a particular subcategory of complication.

**TABLE S2: Complications of Cranioplasty<sup>a</sup>**

| Authors and Year                                                                                                                                                                                            | Complication <sup>b</sup> | Indication for DC <sup>b</sup> | Reported Frequency <sup>c</sup> | Overall Frequency <sup>c</sup> |
|-------------------------------------------------------------------------------------------------------------------------------------------------------------------------------------------------------------|---------------------------|--------------------------------|---------------------------------|--------------------------------|
| <b>Hemorrhagic Complications</b>                                                                                                                                                                            |                           |                                |                                 |                                |
| Martin et al., 2014 [136]<br>Bobinski et al., 2013 [120]<br>Schuss et al., 2012 [121]<br>Huang et al., 2011 [21]<br>Malmivaara et al., 2011 [11]<br>Huang et al., 2008 [52]<br>Skoglund et al., 2006 [67]   | Ipsilateral Hematoma      | TBI                            | 5.4% (23/426)                   | 3.6% (113/3101)                |
| Ewald et al., 2013 [122]<br>Piedra et al., 2013 [123]<br>Schuss et al., 2012 [121]<br>Guresir et al., 2011 [19]                                                                                             |                           | Stroke                         | 4.6% (13/285)                   |                                |
| Guresir et al., 2011 [19]                                                                                                                                                                                   |                           | ICH                            | 15.4% (2/13)                    |                                |
| Guresir et al., 2011 [19]                                                                                                                                                                                   |                           | SAH                            | 4.8% (2/42)                     |                                |
| Schuss et al., 2012 [121]                                                                                                                                                                                   |                           | ICH/SAH                        | 7.5% (7/93)                     |                                |
| Woertgen et al., 2006 [41]                                                                                                                                                                                  |                           | SDH                            | 1.4% (1/69)                     |                                |
| Piedra et al., 2014 [130]                                                                                                                                                                                   |                           | Trauma                         | 2.5% (4/157)                    |                                |
| Coulter et al., 2014 [129]<br>Sundseth et al., 2014 [132]<br>Thien et al., 2014 [133]<br>Wachter et al., 2013 [134]<br>Dunisch et al., 2013 [137]<br>Lee et al., 2013 [135]<br>Malmivaara et al., 2011 [12] |                           | Numerous                       | 2.7% (33/1227)                  |                                |
| Walcott et al., 2013 [128]<br>Archavlis et al., 2012 [127]<br>Schuss et al., 2012 [121]<br>Godil et al., 2011 [64]<br>Lee et al., 2011 [124]<br>Gooch et al., 2009 [126]<br>Lee et al., 2009 [125]          |                           | Unspecified                    | 2.8% (22/789)                   |                                |
| Chitale et al., 2013 [160]                                                                                                                                                                                  |                           | Hemorrhagic Transformation     | Stroke                          |                                |
| <b>Infectious Complications</b>                                                                                                                                                                             |                           |                                |                                 |                                |
| Bobinski et al., 2013 [120]<br>Cooper et al., 2011 [14]<br>Huang et al., 2011 [21]                                                                                                                          | Superficial Complications | TBI                            | 5.4% (14/257)                   | 9.6% (163/1698)<br>Adult       |
| Bowers et al., 2013 [140]<br>Kan et al., 2006 [71]                                                                                                                                                          |                           | Peds TBI                       | 9.4% (10/106)                   |                                |
| Ewald et al., 2013 [122]<br>Piedra et al., 2013 [123]<br>Schuss et al., 2013 [61]                                                                                                                           |                           | Stroke                         | 9.1% (24/265)                   |                                |
| Shah et al., 2013 [139]                                                                                                                                                                                     |                           | Peds Stroke                    | 33% (1/3)                       |                                |



|                                                                                                                                                                                                                                                                                                        |                                   |                          |                |                          |              |                       |
|--------------------------------------------------------------------------------------------------------------------------------------------------------------------------------------------------------------------------------------------------------------------------------------------------------|-----------------------------------|--------------------------|----------------|--------------------------|--------------|-----------------------|
| Piedra et al., 2014 [130]                                                                                                                                                                                                                                                                              |                                   | Trauma                   | 10.8% (17/157) |                          |              |                       |
| Cheng et al., 2014 [138]<br>Coulter et al., 2014 <sup>d</sup> [129]<br>Thien et al., 2014 [133]<br>Wachter et al., 2013 [134]<br>Sobani et al., 2011 [131]<br>Inamasu et al., 2010 [141]                                                                                                               |                                   | Numerous                 | 10.1% (79/780) |                          |              |                       |
| Walcott et al., 2013 [128]                                                                                                                                                                                                                                                                             |                                   | Unspecified              | 12.1% (29/239) |                          |              |                       |
| Schuss et al., 2012 [121]<br>Cooper et al., 2011 [14]<br>Guresir et al., 2011 [19]<br>Huang et al., 2011 [21]<br>Albanese et al., 2003 [86]                                                                                                                                                            |                                   | TBI                      | 4.8% (20/420)  |                          |              |                       |
| Perez et al., 2011 [77]<br>Kan et al., 2006 [71]                                                                                                                                                                                                                                                       | Deep Complications                | Peds TBI                 | 4.6% (3/65)    | 3.8% (89/2359)<br>Adult  |              |                       |
| Ewald et al., 2013 [122]<br>Schuss et al., 2013 [61]<br>Guresir et al., 2011 [19]<br>Mandon et al., 2010 [113]<br>Vahedi et al., 2007 [79]                                                                                                                                                             |                                   | Stroke                   | 3.3% (8/243)   |                          |              |                       |
| Guresir et al., 2011 [19]                                                                                                                                                                                                                                                                              |                                   | ICH                      | 7.7% (1/13)    |                          |              |                       |
| Guresir et al., 2011 [19]                                                                                                                                                                                                                                                                              |                                   | SAH                      | 4.8% (2/42)    |                          |              |                       |
| Missori et al., 2003 [147]                                                                                                                                                                                                                                                                             |                                   | SDH                      | 3.3% (1/30)    |                          |              |                       |
| Cheng et al., 2014 [138]<br>Coulter et al., 2014 <sup>d</sup> [129]<br>Heo et al., 2014 [143]<br>Thien et al., 2014 [133]<br>Dunisch et al., 2013 [137]<br>Sobani et al., 2011 [131]<br>Kim et al., 2009 [108]<br>Nassiri et al., 2009 [144]<br>Andrzejak et al., 2005 [145]<br>Yoo et al., 1999 [110] |                                   | Numerous                 | 3.8% (52/1361) |                          |              |                       |
| Hohne et al., 2013 [142]<br>Archavlis et al., 2012 [127]                                                                                                                                                                                                                                               |                                   | Unspecified              | 2.0% (5/250)   |                          |              |                       |
| Martin et al., 2014 [136]<br>Cooper et al., 2011 [14]<br>Malmivaara et al., 2011 [11]                                                                                                                                                                                                                  |                                   | Meningitis/Ventriculitis | TBI            |                          | 4.5% (7/154) | 4.5% (7/154)<br>Adult |
| Martin et al., 2014 [136]                                                                                                                                                                                                                                                                              |                                   |                          | Peds TBI       |                          | 5.6% (1/18)  |                       |
| Martin et al., 2014 [136]                                                                                                                                                                                                                                                                              |                                   |                          | Adolescent TBI |                          | 1.1% (1/9)   |                       |
| Honeybul et al., 2014 [20]<br>Martin et al., 2014 [136]<br>Bowers et al., 2013 [140]<br>Hayes et al., 2013 [91]<br>Honeybul et al., 2012 [151]<br>Al-Jishi et al., 2011 [36]<br>Ho et al., 2011 [10]                                                                                                   | Bone flap/Prosthesis<br>Infection | TBI                      | 8.0% (74/923)  | 5.4% (164/3056)<br>Adult |              |                       |

|                                                                                                                                                                                                                                                                                                    |                |                                                                    |                |               |                |                 |
|----------------------------------------------------------------------------------------------------------------------------------------------------------------------------------------------------------------------------------------------------------------------------------------------------|----------------|--------------------------------------------------------------------|----------------|---------------|----------------|-----------------|
| Honeybul et al., 2011 [38]<br>Aarabi et al., 2006 [29]                                                                                                                                                                                                                                             |                |                                                                    |                |               |                |                 |
| Kan et al., 2006 [71]                                                                                                                                                                                                                                                                              |                | Peds TBI                                                           | 2.9% (1/35)    |               |                |                 |
| Martin et al., 2014 [136]                                                                                                                                                                                                                                                                          |                | Adolescent TBI                                                     | 2.2% (2/9)     |               |                |                 |
| Shah et al., 2013 [139]                                                                                                                                                                                                                                                                            |                | Peds Stroke                                                        | 33.3% (1/3)    |               |                |                 |
| Sundseth et al., 2014 [132]<br>Lee et al., 2013 [135]<br>Stefini et al., 2013 [150]<br>Hitchings et al., 2010 [43]                                                                                                                                                                                 |                | Numerous                                                           | 3.1% (59/1886) |               |                |                 |
| Kano et al., 2012 [148]<br>Lee et al., 2009 [125]<br>Shoakazemi et al., 2009 [109]                                                                                                                                                                                                                 |                | Unspecified, Adult                                                 | 8.5% (21/247)  |               |                |                 |
| Piedra et al., 2012 [149]                                                                                                                                                                                                                                                                          |                | Unspecified, Peds                                                  | 6.6% (4/61)    |               |                |                 |
| Kung et al., 2012 [92]<br>Rotaru et al., 2012 [154]<br>Schuss et al., 2012 [121]<br>Cooper et al., 2011 [14]<br>Malmivaara et al., 2011 [11]<br>Beauchamp et al., 2010 [152]<br>Honeybul et al., 2010 [101]<br>Stephens et al., 2010 [66]<br>Aarabi et al., 2006 [29]<br>Guerra et al., 1999 [104] |                | Infection/Wound<br>Healing Disturbance,<br>Not otherwise specified | TBI            |               | 10.1% (57/564) | 7.3% (152/2092) |
| Figaji et al., 2006 [155]                                                                                                                                                                                                                                                                          | Peds TBI       |                                                                    | 8.3% (1/12)    |               |                |                 |
| Schuss et al., 2012 [121]                                                                                                                                                                                                                                                                          | Stroke         |                                                                    | 2.5% (2/80)    |               |                |                 |
| Schuss et al., 2012 [121]                                                                                                                                                                                                                                                                          | ICH/SAH        |                                                                    | 5.4% (5/93)    |               |                |                 |
| Lee et al., 2013 [135]<br>Malmivaara et al., 2011 [12]<br>Inamasu et al., 2010 [141]<br>Nassiri et al., 2009 [144]<br>Movassaghi et al., 2006                                                                                                                                                      | Numerous       |                                                                    | 6.4% (27/422)  |               |                |                 |
| Grant et al., 2004                                                                                                                                                                                                                                                                                 | Numerous, Peds |                                                                    | 5% (2/40)      |               |                |                 |
| Oladunjoye et al., 2013<br>Walcott et al., 2013<br>Im et al., 2012<br>Lee et al., 2011 [124]<br>Gooch et al., 2009 [126]<br>Schulz-Stubner et al., 2009<br>Shoakazemi et al., 2009 [109]                                                                                                           | Unspecified    |                                                                    | 6.5% (61/933)  |               |                |                 |
| CSF Disturbances                                                                                                                                                                                                                                                                                   |                |                                                                    |                |               |                |                 |
| Honeybul et al., 2012 [96]<br>Skoglund et al., 2006 [67]                                                                                                                                                                                                                                           | Hydrocephalus  |                                                                    | TBI            | 6.2% (11/178) | 7.5% (48/641)  |                 |
| Takeuchi et al., 2013 [87]<br>Piedra et al., 2013 [123]                                                                                                                                                                                                                                            |                |                                                                    | Stroke         | 9.8% (10/102) |                |                 |
| Hayes et al., 2013 [91]                                                                                                                                                                                                                                                                            |                | ICH                                                                | 5.6% (1/18)    |               |                |                 |
| Oladunjoye et al., 2013 [13]                                                                                                                                                                                                                                                                       |                | Numerous                                                           | 7.6% (26/343)  |               |                |                 |

|                                                                                                                                                                                                                                                                                                        |                              |                |                     |                         |
|--------------------------------------------------------------------------------------------------------------------------------------------------------------------------------------------------------------------------------------------------------------------------------------------------------|------------------------------|----------------|---------------------|-------------------------|
| Walcott et al., 2013 [128]<br>Malmivaara et al., 2011 [12]                                                                                                                                                                                                                                             |                              |                |                     |                         |
| Piedra et al. 2012 [149]                                                                                                                                                                                                                                                                               |                              | Peds Numerous  | 3.3% (2/61)         |                         |
| Martin et al., 2014 [136]<br>Archavlis et al., 2012 [127]<br>Honeybul et al., 2012<br>Schuss et al., 2012 [121]<br>Chun et al., 2011<br>Guresir et al., 2011 [19]<br>Huang et al., 2011 [21]<br>Huang et al., 2008 [52]                                                                                | Subdural<br>Effusion/Hygroma | TBI            | 6.4% (53/824)       | 5.8% (58/993)<br>Adult  |
| Martin et al., 2014 [136]<br>Ruf et al., 2003                                                                                                                                                                                                                                                          |                              | Peds TBI       | 8.3% (2/24)         |                         |
| Schuss et al., 2012 [121]<br>Guresir et al., 2011 [19]                                                                                                                                                                                                                                                 |                              | ICH            | 6.1% (2/33)         |                         |
| Wachter et al., 2013 [134]                                                                                                                                                                                                                                                                             |                              | Numerous       | 2.2% (3/136)        |                         |
| Martin et al., 2014 [136]<br>Huang et al., 2011 [21]                                                                                                                                                                                                                                                   | CSF Leak                     | TBI            | 8.6% (15/174)       | 6.8% (29/428)<br>Adult  |
| Martin et al., 2014 [136]<br>Figaji et al., 2006 [155]                                                                                                                                                                                                                                                 |                              | Peds TBI       | 1.0% (3/30)         |                         |
| Martin et al., 2014 [136]                                                                                                                                                                                                                                                                              |                              | Adolescent TBI | 1.1% (1/9)          |                         |
| Woertgen et al., 2006 [41]                                                                                                                                                                                                                                                                             |                              | SDH            | 8.7% (6/69)         |                         |
| Godil et al., 2011 [64]<br>Sobani et al., 2011 [131]                                                                                                                                                                                                                                                   |                              | Numerous       | 4.3% (8/185)        |                         |
| Schuss et al., 2012 [121]<br>Skoglund et al., 2006 [67]                                                                                                                                                                                                                                                | CSF Fistula                  | TBI            | 1.7% (2/117)        | 1.3% (8/597)            |
| Schuss et al., 2012 [121]                                                                                                                                                                                                                                                                              |                              | Stroke         | 1.3% (1/80)         |                         |
| Schuss et al., 2012 [121]<br>Guresir et al., 2011 [19]                                                                                                                                                                                                                                                 |                              | ICH            | 3.2% (2/63)         |                         |
| Hohne et al., 2013 [142]<br>Guresir et al., 2011 [19]                                                                                                                                                                                                                                                  |                              | Numerous       | 0.9% (3/337)        |                         |
| <b>Bone Flap Resorption/Depression and Cosmetic Defects</b>                                                                                                                                                                                                                                            |                              |                |                     |                         |
| Honeybul et al., 2014 [20]<br>Martin et al., 2014 [136]<br>Bowers et al., 2013 [140]<br>Schuss et al., 2013 [158]<br>Honeybul et al., 2012 [151]<br>Guresir et al., 2011 [19]<br>Honeybul et al., 2011 [38]<br>Malmivaara et al., 2011 [11]<br>Honeybul et al., 2010 [101]<br>Aarabi et al., 2006 [29] | Bone Flap Resorption         | TBI            | 13.5%<br>(138/1019) | 16% (357/2237)<br>Adult |
| Martin et al., 2014 [136]                                                                                                                                                                                                                                                                              |                              | Peds TBI       | 72.2% (13/18)       |                         |
| Adamo et al., 2009 [73]                                                                                                                                                                                                                                                                                |                              | Infantile TBI  | 28.6% (2/7)         |                         |
| Ewald et al., 2013 [122]<br>Piedra et al., 2013 [123]                                                                                                                                                                                                                                                  |                              | Stroke         | 12.7% (28/221)      |                         |

|                                                                                                                         |                                                   |                    |                |                |
|-------------------------------------------------------------------------------------------------------------------------|---------------------------------------------------|--------------------|----------------|----------------|
| Schuss et al., 2013 [158]                                                                                               |                                                   |                    |                |                |
| Schuss et al., 2013 [158]<br>Fung et al., 2012 [16]                                                                     |                                                   | ICH                | 6.5% (2/31)    |                |
| Schuss et al., 2013 [158]                                                                                               |                                                   | SAH                | 1.4% (1/71)    |                |
| Piedra et al., 2014 [130]                                                                                               |                                                   | Trauma             | 17.2% (27/157) |                |
| Sundseth et al., 2014 [132]<br>Dunisch et al., 2013 [137]<br>Wachter et al., 2013 [134]<br>Malmivaara et al., 2011 [12] |                                                   | Numerous           | 26% (155/597)  |                |
| Shoakazemi et al., 2009 [109]<br>Gooch et al., 2009 [126]                                                               |                                                   | Unspecified, Adult | 4.35 (6/141)   |                |
| Piedra et al., 2012 [149]                                                                                               |                                                   | Unspecified, Peds  | 29.5% (18/61)  |                |
| Bobinski et al., 2013 [120]<br>Rotaru et al., 2012 [154]<br>Cooper et al., 2011 [14]                                    | Bone Flap<br>Depression/Other<br>Cosmetic Defects | TBI                | 4.5% (6/132)   | 3.1% (71/2282) |
| Thomale et al., 2010 [159]<br>Ruf et al., 2003 [157]                                                                    |                                                   | Peds TBI           | 6.8% (4/59)    |                |
| Coulter et al., 2014 [129]<br>Stefini et al., 2013 [150]<br>Wachter et al., 2013 [134]<br>Kumar et al., 2011 [37]       |                                                   | Numerous           | 2.7% (52/1950) |                |
| Grant et al., 2004 [146]                                                                                                |                                                   | Numerous, Peds     | 50% (20/40)    |                |
| Lee et al., 2011 [124]<br>Gooch et al., 2009 [126]<br>Shoakazemi et al., 2009 [109]                                     |                                                   | Unspecified        | 6.5% (13/200)  |                |
|                                                                                                                         |                                                   |                    |                |                |

<sup>a</sup> TBI = traumatic brain injury; Stroke = ischemic stroke; ICH = intracerebral hemorrhage; SAH = subarachnoid hemorrhage; EDH = epidural hematoma; SDH = subdural hematoma. All data reported in this table refers to adult injury, except where specifically noted.

<sup>b</sup> Complications and indications for DC and subsequent cranioplasty were categorized according to authors' descriptions.

<sup>c</sup> Frequencies were first calculated for individual reports and then averaged across all reports for a particular subcategory of complication.

<sup>d</sup> Authors in this report grouped superficial and deep complications together [21.7% (36/166) of patients]. This data was included in the calculation of overall incidence in both categories.

## Online Supplement

### **METHODS**

#### *Search parameters and organizational strategy*

We utilized two search strategies when compiling references for this comprehensive review. First, we performed a search on PubMed/Medline using the following specific search terms: (((((decompressive craniectomy[Title/Abstract] OR decompressive hemicraniectomy[Title/Abstract]) AND outcomes[Title/Abstract])) OR ((decompressive craniectomy[Title/Abstract] OR decompressive hemicraniectomy[Title/Abstract]) AND complications[Title/Abstract])). This strategy yielded 359 papers as of September 6, 2014. In order to perform a more inclusive search strategy, we next performed a search on PubMed/Medline using the following broad terms: (((Search "Craniocerebral Trauma"[Mesh] OR "Brain Edema"[Mesh] OR oedema\*[Title/Abstract] OR edema\*[Title/Abstract] OR contusion\*[Title/Abstract] OR concus\*[Title/Abstract] OR fracture\*[Title/Abstract] OR "Brain Edema"[Mesh] OR "Intracranial Hypertension"[Mesh] OR "Craniocerebral Trauma"[Mesh] OR "Unconsciousness"[Mesh] OR "Subarachnoid Hemorrhage"[Mesh] OR "Stroke"[Mesh] OR Stroke[Title/Abstract] OR "Intracranial Hemorrhages"[Mesh] OR "Intracranial Hemorrhage, Hypertensive"[Mesh] OR "Intracranial Hemorrhage, Traumatic"[Mesh] OR "Vasospasm, Intracranial"[Mesh] OR "hypoxia-ischemia, brain" [Mesh])) AND (decompressive craniect\*[Title/Abstract] OR craniect\*[Title/Abstract] OR hemicranial decompression[Title/Abstract] OR bifrontal decompr\*[Title/Abstract] OR bifrontal decompres\*[Title/Abstract] OR bifrontal craniectomies[Title/Abstract] OR bifrontal craniect\*[Title/Abstract] OR "Decompressive Craniectomy"[Mesh])) NOT ("Animals"[Mesh]

NOT "Animals"[Mesh])). This yielded 1483 papers on Sept 6, 2014. A total of 1578 records were screened after duplicates were removed (Figure S1). Of these, 314 records were deemed ineligible for various reasons (e.g., reviews or method papers, without patient data; animal models; off-topic). Of the 1264 potentially eligible records remaining, 1122 were excluded if they were commentaries/editorials, case reports or contained no data on complications directly relating to DC. A final total of 142 reports were analyzed in detail for this review.
